# Supplementary material for: Comparing the accuracy of quantitative versus qualitative analyses of interim PET to prognosticate Hodgkin lymphoma: a systematic review protocol of diagnostic test accuracy
Source: PubMed Central journal article supplement — BMJ Open. 2016 Aug 5;6(8):e011729. doi: 10.1136/bmjopen-2016-011729 (PMC4986203; doi:10.1136/bmjopen-2016-011729), 2016-08-05
Supplement: bmjopen-2016-011729supp_appendixI.pdf [file bmjopen-2016-011729supp_appendixI.pdf]

# Appendix I: Critical appraisal instrument

## Appendix I: Critical appraisal checklist

JBI Critical Appraisal Checklist for Diagnostic Test Accuracy Studies

Reviewer \_\_\_\_\_ Date \_\_\_\_\_

Author \_\_\_\_\_ Year \_\_\_\_\_ Record Number \_\_\_\_\_

|                                                                                                        | Yes                      | No                       | Unclear                  | Not applicable           |
|--------------------------------------------------------------------------------------------------------|--------------------------|--------------------------|--------------------------|--------------------------|
| 1. Was a consecutive or random sample of patients enrolled?                                            | <input type="checkbox"/> | <input type="checkbox"/> | <input type="checkbox"/> | <input type="checkbox"/> |
| 2. Was a case-control design avoided?                                                                  | <input type="checkbox"/> | <input type="checkbox"/> | <input type="checkbox"/> | <input type="checkbox"/> |
| 3. Did the study avoid inappropriate exclusions?                                                       | <input type="checkbox"/> | <input type="checkbox"/> | <input type="checkbox"/> | <input type="checkbox"/> |
| 4. Were the index test results interpreted without knowledge of the results of the reference standard? | <input type="checkbox"/> | <input type="checkbox"/> | <input type="checkbox"/> | <input type="checkbox"/> |
| 5. If a threshold was used, was it pre-specified?                                                      | <input type="checkbox"/> | <input type="checkbox"/> | <input type="checkbox"/> | <input type="checkbox"/> |
| 6. Is the reference standard likely to correctly classify the target condition?                        | <input type="checkbox"/> | <input type="checkbox"/> | <input type="checkbox"/> | <input type="checkbox"/> |
| 7. Were the reference standard results interpreted without knowledge of the results of the index test? | <input type="checkbox"/> | <input type="checkbox"/> | <input type="checkbox"/> | <input type="checkbox"/> |
| 8. Was there an appropriate interval between the index test and the reference standard?                | <input type="checkbox"/> | <input type="checkbox"/> | <input type="checkbox"/> | <input type="checkbox"/> |
| 9. Did all patients receive the same reference standard?                                               | <input type="checkbox"/> | <input type="checkbox"/> | <input type="checkbox"/> | <input type="checkbox"/> |
| 10. Were all patients included in the analysis?                                                        | <input type="checkbox"/> | <input type="checkbox"/> | <input type="checkbox"/> | <input type="checkbox"/> |

Overall appraisal: Include  Exclude  Seek further info

-----  
-----  
-----
