# Supplementary material for: Comparing the accuracy of quantitative versus qualitative analyses of interim PET to prognosticate Hodgkin lymphoma: a systematic review protocol of diagnostic test accuracy
Source: PubMed Central journal article supplement — BMJ Open. 2016 Aug 5;6(8):e011729. doi: 10.1136/bmjopen-2016-011729 (PMC4986203; doi:10.1136/bmjopen-2016-011729), 2016-08-05
Supplement: bmjopen-2016-011729supp_appendixII.pdf [file bmjopen-2016-011729supp_appendixII.pdf]

## Appendix II: Data extraction instrument

|                                                                                                                                 |                              |
|---------------------------------------------------------------------------------------------------------------------------------|------------------------------|
| Author/Date                                                                                                                     |                              |
| Inclusion/exclusion criteria: i.e. presenting symptoms, results from previous tests                                             | Inclusion:<br><br>Exclusion: |
| Sample size                                                                                                                     |                              |
| Participant demographics (i.e. age, sex, spectrum of presenting symptoms, comorbidity, current treatments, recruitment centres) |                              |
| Study methodology (consecutive or random; retrospective or prospective)                                                         |                              |
| Period that study was carried out (beginning and end date)                                                                      |                              |
| Index test description (including criteria for positive test)                                                                   |                              |
| Reference test description (including criteria for positive test)                                                               |                              |
| Geographical location of data collection                                                                                        |                              |
| Setting of data collection                                                                                                      |                              |
| Persons executing and interpreting index tests (numbers, training, and expertise)                                               |                              |
| Persons executing and interpreting reference test                                                                               |                              |
| Index/reference time interval (and treatments carried out in between)                                                           |                              |
| Distribution of severity of disease in those with target condition                                                              |                              |
| Other diagnoses in those without target condition                                                                               |                              |
| Adverse events from index test                                                                                                  |                              |
| Adverse events from reference test                                                                                              |                              |

| Index test results<br>Threshold= | Condition<br>positive | Condition<br>negative | Total |
|----------------------------------|-----------------------|-----------------------|-------|
| Index test positive (T+)         |                       |                       |       |
| Index test negative (T-)         |                       |                       |       |
| Total                            |                       |                       |       |
